# Supplementary material
Source: HighWire-hosted journal article supplement (https://bjo.bmj.com/highwire/filestream/240246/field_highwire_adjunct_files/0/bjo-2023-323648supp001_data_supplement.pdf)
Supplement: bjo-2023-323648supp001_data_supplement.pdf [file bjo-2023-323648supp001_data_supplement.pdf]

## EGS Research Priorities Delphi Survey - Round 2 Results Summary

### Response rates

|                          |             |                                                                                                                                 |                   |                    |             |             |             |
|--------------------------|-------------|---------------------------------------------------------------------------------------------------------------------------------|-------------------|--------------------|-------------|-------------|-------------|
| <input type="checkbox"/> | <b>OPEN</b> | Glaucoma research priorities for patients - French<br><a href="#">Design</a> <a href="#">Distribute</a> <a href="#">Analyse</a> | v1atatha@ed.ac.uk | 20 of<br>68 (29%)  | 24 Aug 2022 | 1 Oct 2022  | 8 DAYS LEFT |
| <input type="checkbox"/> | <b>OPEN</b> | Glaucoma research priorities for patients - German<br><a href="#">Design</a> <a href="#">Distribute</a> <a href="#">Analyse</a> | v1atatha@ed.ac.uk | 25 of<br>46 (54%)  | 24 Aug 2022 | 1 Oct 2022  | 8 DAYS LEFT |
| <input type="checkbox"/> | <b>OPEN</b> | Glaucoma research priorities for patients - Spain<br><a href="#">Design</a> <a href="#">Distribute</a> <a href="#">Analyse</a>  | v1atatha@ed.ac.uk | 5 of<br>18 (27%)   | 24 Aug 2022 | 1 Oct 2022  | 8 DAYS LEFT |
| <input type="checkbox"/> | <b>OPEN</b> | Glaucoma research priorities for patients<br><a href="#">Design</a> <a href="#">Distribute</a> <a href="#">Analyse</a>          | v1atatha@ed.ac.uk | 61 of<br>147 (41%) | 24 Aug 2022 | 1 Oct 2022  | 8 DAYS LEFT |
| <input type="checkbox"/> | <b>OPEN</b> | EGS research priorities round 2<br><a href="#">Design</a> <a href="#">Distribute</a> <a href="#">Analyse</a>                    | v1atatha@ed.ac.uk | 97 of<br>147 (65%) | 24 Aug 2022 | 23 Sep 2022 |             |

279 patients provided email and were invited to participate in round 2. 111 responded (39.8% response rate), including 61 responding to the English language survey, 5 to the Spanish survey, 25 to the German survey and 20 to the French survey.

147 clinicians provided their email and were invited to participate in round 2. 65% responded. 2 reminder emails were sent, only to those who did not respond to the initial email.

For round 2 patients were asked to score each research priority from 1 (least important) to 5 (most important).

**Clinician Round 2 scores (0 to 5, with 5 being very important)**

| Priority                                                                              | Mean     |
|---------------------------------------------------------------------------------------|----------|
| Better tools to detect progression and risk of rapid progression                      | 4.309278 |
| Improved surgical treatments                                                          | 4.175258 |
| Stopping progression of glaucoma                                                      | 4.123711 |
| Improved management of advanced glaucoma                                              | 4.082474 |
| Improved evidence for current surgical treatments                                     | 4.051546 |
| Neuroprotection and non IOP treatments                                                | 3.989691 |
| Improved modulation of wound healing                                                  | 3.979381 |
| New medical treatments                                                                | 3.969072 |
| Artificial intelligence in glaucoma management                                        | 3.917526 |
| Screening early diagnosis avoiding late diagnosis                                     | 3.886598 |
| Improved evidence for current treatments                                              | 3.835052 |
| Treatments to restore vision                                                          | 3.835052 |
| Glaucoma registers and real world data                                                | 3.814433 |
| Improved MIGS or better evidence for MIGS                                             | 3.762887 |
| Improved prediction of response to treatment                                          | 3.721649 |
| Novel or improved methods of imaging                                                  | 3.711340 |
| Treatments with fewer side effects                                                    | 3.670103 |
| Sustained release and longer acting treatments                                        | 3.597938 |
| Avoiding overtreatment                                                                | 3.587629 |
| Quality of life evaluation and improvement                                            | 3.587629 |
| Setting appropriate treatment targets                                                 | 3.567010 |
| Standardising outcomes                                                                | 3.556701 |
| Glaucoma revision surgery                                                             | 3.536082 |
| Increasing public awareness                                                           | 3.525773 |
| Improved understanding of risk factors                                                | 3.515464 |
| Identify causes of glaucoma                                                           | 3.505155 |
| Better evidence for treatments for angle closure                                      | 3.474227 |
| Improved understanding or integration of structure and function tests                 | 3.463918 |
| Trabecular meshwork regeneration                                                      | 3.422680 |
| Improved evidence for current laser treatments or development of new laser treatments | 3.412371 |
| Standardising training in glaucoma                                                    | 3.391753 |
| Genetics of glaucoma                                                                  | 3.371134 |
| Solutions for low to middle income settings                                           | 3.371134 |
| Improved assessment of visual function                                                | 3.360825 |
| Telemedicine and self monitoring                                                      | 3.360825 |
| Improving patient education                                                           | 3.340206 |
| Better understanding of and treatments for secondary glaucomas                        | 3.309278 |
| Sustainable healthcare delivery                                                       | 3.309278 |
| Cost effectiveness of glaucoma care                                                   | 3.257732 |
| Improved methods of IOP assessment                                                    | 3.257732 |
| Improving adherence and drop instillation                                             | 3.257732 |
| Improved understanding or ability to modulate ocular blood flow                       | 3.175258 |
| Reduce variability in care                                                            | 3.164948 |
| Improving patient doctor communication                                                | 3.082474 |
| Improved understanding of rare forms of glaucoma                                      | 2.845361 |
| Improved definition of glaucoma                                                       | 2.824742 |
| Methods to reduce the carbon footprint of treatments                                  | 2.742268 |

## Patient responses (pooled from all countries)

| Priority                                                                            | Mean     |
|-------------------------------------------------------------------------------------|----------|
| Treatments to restore vision                                                        | 4.495495 |
| Better ways to stop sight loss                                                      | 4.477477 |
| Finding a cure                                                                      | 4.400000 |
| Improved detection of worsening glaucoma                                            | 4.360360 |
| Development of treatments to avoid need for eye drops                               | 4.216216 |
| Better ways to avoid surgery                                                        | 4.162162 |
| Better medical treatments                                                           | 4.135135 |
| Treatments to keep patients independent                                             | 4.135135 |
| Treatments with fewer side effects                                                  | 4.135135 |
| Improved diagnostic tests                                                           | 4.099099 |
| Better understanding of what causes glaucoma and risk factors                       | 4.064220 |
| Genetics of glaucoma                                                                | 4.036036 |
| Better treatments for children and young patients                                   | 4.018018 |
| Better surgical or laser treatments                                                 | 3.990909 |
| Better delivery of care e g shorter waiting times or less visits                    | 3.954955 |
| Improving visual field tests                                                        | 3.945946 |
| Methods to treat glaucoma other than by lowering eye pressure                       | 3.918919 |
| Screening early diagnosis avoiding late diagnosis                                   | 3.900000 |
| Longer lasting sustained release medications                                        | 3.882883 |
| Improved evidence for new surgical options                                          | 3.855856 |
| Methods for patients to measure their own eye pressure or monitor their own disease | 3.792793 |
| Improving living with glaucoma                                                      | 3.720721 |
| Improving patient doctor communication                                              | 3.702703 |
| Less invasive treatments                                                            | 3.702703 |
| Drops with fewer side effects                                                       | 3.693694 |
| Improved ways of identifying glaucoma experts                                       | 3.666667 |
| Patient education and self help                                                     | 3.657658 |
| Improved methods of measuring eye pressure                                          | 3.630631 |
| Affordable treatments                                                               | 3.612613 |
| Improve awareness among public                                                      | 3.536364 |
| Increasing public awareness                                                         | 3.486486 |
| Making eye drops easier to use                                                      | 3.387387 |
| Improving psychological support                                                     | 3.369369 |
| Register of patients with glaucoma                                                  | 3.243243 |
| Improving adherence                                                                 | 3.203704 |

## Patient responses – Round 1

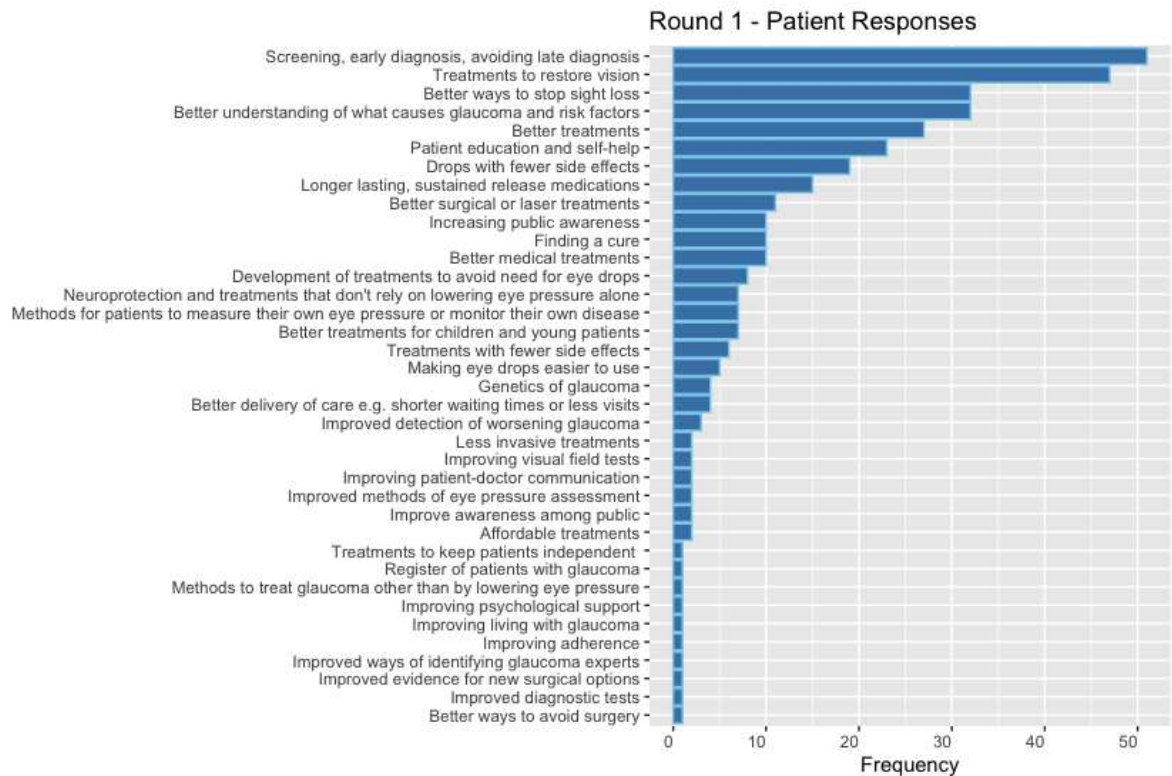

## Patient responses – Round 1

| Priority                                                            | Frequency |
|---------------------------------------------------------------------|-----------|
| 1 Affordable treatments                                             | 2         |
| 2 Better delivery of care e.g. shorter waiting times or less visits | 4         |
| 3 Better medical treatments                                         | 10        |
| 4 Better surgical or laser treatments                               | 11        |
| 5 Better treatments                                                 | 27        |
| 6 Better treatments for children and young patients                 | 7         |
| 7 Better understanding of what causes glaucoma and risk factors     | 32        |
| 8 Better ways to avoid surgery                                      | 1         |
| 9 Better ways to stop sight loss                                    | 32        |
| 10 Development of treatments to avoid need for eye drops            | 8         |
| 11 Drops with fewer side effects                                    | 19        |
| 12 Finding a cure                                                   | 10        |
| 13 Genetics of glaucoma                                             | 4         |
| 15 Improve awareness among public                                   | 2         |
| 16 Improved detection of worsening glaucoma                         | 3         |
| 17 Improved diagnostic tests                                        | 1         |

|    |                                                                                     |    |
|----|-------------------------------------------------------------------------------------|----|
| 18 | Improved evidence for new surgical options                                          | 1  |
| 19 | Improved methods of eye pressure assessment                                         | 2  |
| 20 | Improved ways of identifying glaucoma experts                                       | 1  |
| 21 | Improving adherence                                                                 | 1  |
| 22 | Improving living with glaucoma                                                      | 1  |
| 23 | Improving patient-doctor communication                                              | 2  |
| 24 | Improving psychological support                                                     | 1  |
| 25 | Improving visual field tests                                                        | 2  |
| 26 | Increasing public awareness                                                         | 10 |
| 27 | Less invasive treatments                                                            | 2  |
| 28 | Longer lasting, sustained release medications                                       | 15 |
| 29 | Making eye drops easier to use                                                      | 5  |
| 30 | Methods for patients to measure their own eye pressure or monitor their own disease | 7  |
| 31 | Methods to treat glaucoma other than by lowering eye pressure                       | 1  |
| 32 | Neuroprotection and treatments that don't rely on lowering eye pressure alone       | 7  |
| 33 | Patient education and self-help                                                     | 23 |
| 34 | Register of patients with glaucoma                                                  | 1  |
| 35 | Screening, early diagnosis, avoiding late diagnosis                                 | 51 |
| 38 | Treatments to keep patients independent                                             | 1  |
| 39 | Treatments to restore vision                                                        | 47 |
| 40 | Treatments with fewer side effects                                                  | 6  |

### Summary of Round 1 – Clinician Responses

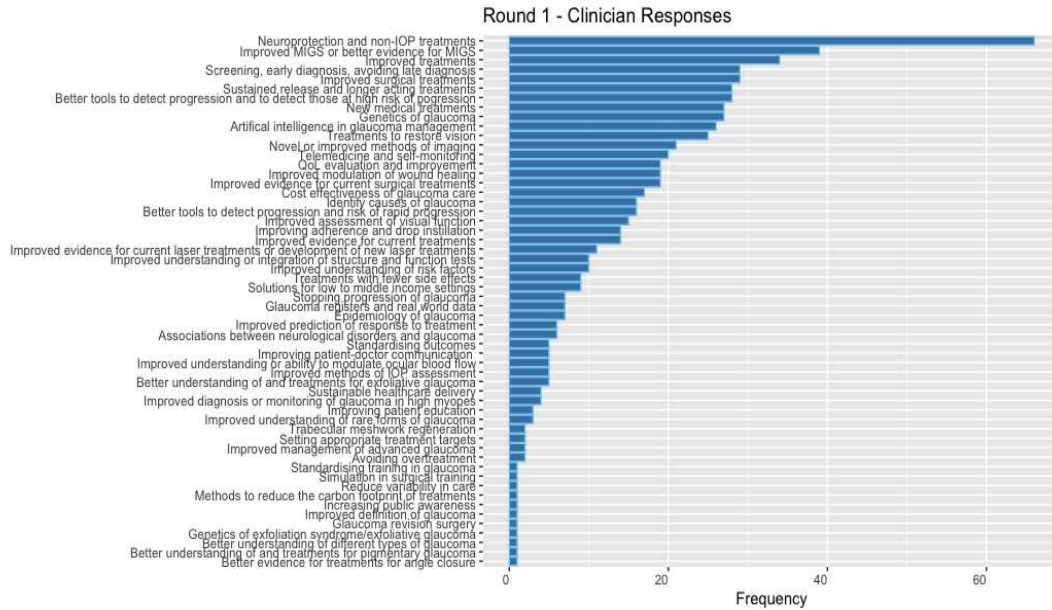

### Summary of Round 1 – Clinician Responses

| Priority                                                                           | Frequency |
|------------------------------------------------------------------------------------|-----------|
| Artificial intelligence in glaucoma management                                     | 26        |
| Associations between neurological disorders and glaucoma                           | 6         |
| Avoiding overtreatment                                                             | 2         |
| Better evidence for treatments for angle closure                                   | 1         |
| Better tools to detect progression and risk of rapid progression                   | 16        |
| Better tools to detect progression and to detect those at high risk of progression | 28        |
| Better understanding of and treatments for exfoliative glaucoma                    | 5         |
| Better understanding of and treatments for pigmentary glaucoma                     | 1         |
| Better understanding of different types of glaucoma                                | 1         |
| Cost effectiveness of glaucoma care                                                | 17        |
| Epidemiology of glaucoma                                                           | 7         |
| Genetics of exfoliation syndrome/exfoliative glaucoma                              | 1         |
| Genetics of glaucoma                                                               | 27        |
| Glaucoma registers and real world data                                             | 7         |
| Glaucoma revision surgery                                                          | 1         |
| Identify causes of glaucoma                                                        | 16        |
| Improved assessment of visual function                                             | 15        |
| Improved definition of glaucoma                                                    | 1         |

|                                                                                       |    |
|---------------------------------------------------------------------------------------|----|
| Improved diagnosis or monitoring of glaucoma in high myopes                           | 4  |
| Improved evidence for current laser treatments or development of new laser treatments | 11 |
| Improved evidence for current surgical treatments                                     | 19 |
| Improved evidence for current treatments                                              | 14 |
| Improved management of advanced glaucoma                                              | 2  |
| Improved methods of IOP assessment                                                    | 5  |
| Improved MIGS or better evidence for MIGS                                             | 39 |
| Improved modulation of wound healing                                                  | 19 |
| Improved prediction of response to treatment                                          | 6  |
| Improved surgical treatments                                                          | 29 |
| Improved treatments                                                                   | 34 |
| Improved understanding of rare forms of glaucoma                                      | 3  |
| Improved understanding of risk factors                                                | 10 |
| Improved understanding or ability to modulate ocular blood flow                       | 5  |
| Improved understanding or integration of structure and function tests                 | 10 |
| Improving adherence and drop instillation                                             | 14 |
| Improving patient education                                                           | 3  |
| Improving patient-doctor communication                                                | 5  |
| Increasing public awareness                                                           | 1  |
| Methods to reduce the carbon footprint of treatments                                  | 1  |
| Neuroprotection and non-IOP treatments                                                | 66 |
| New medical treatments                                                                | 27 |
| Novel or improved methods of imaging                                                  | 21 |
| QoL evaluation and improvement                                                        | 19 |
| Reduce variability in care                                                            | 1  |
| Screening, early diagnosis, avoiding late diagnosis                                   | 29 |
| Setting appropriate treatment targets                                                 | 2  |
| Simulation in surgical training                                                       | 1  |
| Solutions for low to middle income settings                                           | 9  |
| Standardising outcomes                                                                | 5  |
| Standardising training in glaucoma                                                    | 1  |
| Stopping progression of glaucoma                                                      | 7  |
| Sustainable healthcare delivery                                                       | 4  |
| Sustained release and longer acting treatments                                        | 28 |
| Telemedicine and self-monitoring                                                      | 20 |
| Trabecular meshwork regeneration                                                      | 2  |
| Treatments to restore vision                                                          | 25 |
| Treatments with fewer side effects                                                    | 9  |
